# Supplementary material
Source: Springer Nature journal article supplement (https://www.springermedizin.de/resource/supplementary/12885_2012_3527_MOESM2_ESM.pdf/9463898)

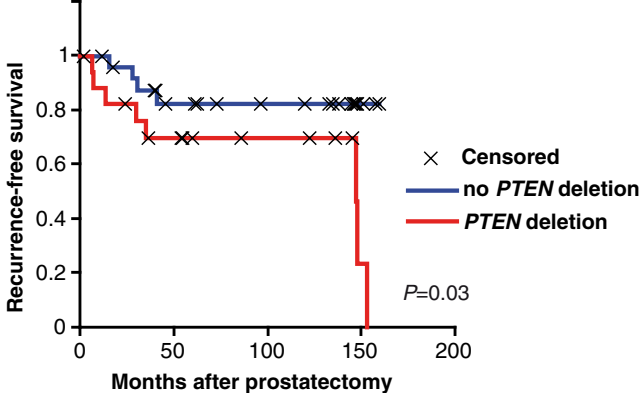

#### Patients at risk

|                         |    |    |    |   |
|-------------------------|----|----|----|---|
| no <i>PTEN</i> deletion | 25 | 17 | 13 | 4 |
| <i>PTEN</i> deletion    | 18 | 11 | 7  | 2 |

Supplement: MOESM2 [file 9463898]
